# Supplementary material
Source: MDPI journal article supplement (https://www.mdpi.com/2073-4441/11/5/1107)
Supplement: s1 [file s1]

## Sheet: Table S1
Table S1: Radiological analysis in rocks: K2O, U, Th; emanation coefficient and radon prodution are removed from Martins [52].
ID	Sample_ID	Geology Group	X	Y	CE	PRN [Bq.m-3.h-1]	K2O (%)	U (ppm)	Th (ppm)
1	PS1	V	614672	4603840	0.107873	400.554	4.92	15.2	22.3
2	PS2	V	614972	4604356	0.0907243	308.319	4.65	14	21.4
3	PS3	V	614983	4603484	0.0343725	131.942	4.39	15.8	19.5
4	CGVR100	V	609502	4591825	0.211549	351.753	5.5	6.7	18.1
5	CGVR101	V	609434	4591731	0.11466	264.327	5	9.3	19.6
6	CGVR105	V	607991	4590506	0.161996	371.266	5.18	9.4	9.8
7	CGVR103	V	609077	4590800	0.221305	399.282	4.52	7.3	21.4
8	CGVR104	V	606426	4591141	0.107758	235.935	5.44	9	18.5
9	CGVR106	V	608307	4589649	0.26003	499.72	5.57	8	26.5
10	CGVR119	V	608359	4589155	0.0981368	356.68	4.68	15.4	26.6
11	CGVR119	V	608359	4589155	0.120847	466.859	4.57	16.4	25.9
12	CGVP9B	V	616146	4601446	0.570878	802.349	6.94	6.1	30.8
13	CGVR114	III	610974	4575992	0.0287369	62.7931	5.13	8.9	4.4
14	CGVR115	III	608708	4576760	0.120017	136.636	5.27	4.4	2.9
15	CGVR115	III	608708	4576760	0.112106	119.902	5.43	4.7	3.9
16	CGVR116	III	609697	4575911	0.0168908	89.8641	5.32	19.8	1.3
17	CGVR116	III	609697	4575911	0.0221574	107.479	5.21	21.7	3.9
18	CGVR13	III	609118	4575779	0.0176851	39.3458	6.6	9	74.1
19	CGVR117	III	609021	4577536	0.0369633	75.5964	5.55	5	67.3
20	CGVR117	III	609021	4577536	0.104252	129.637	5.96	8.3	76.9
21	CGVR118	III	609502	4578037	0.0472311	100.144	5.58	4.9	64.8
22	CGVR118	III	609502	4578037	0.0745591	91.3195	6.2	8.5	70
23	CGVR10	IV	612733	4575032	0.00779722	83.9456	1.22	43.3	25.2
24	CGVR7	IV	612570	4575061	0.0344529	249.606	5.01	29.6	21.6
25	CGVR11	IV	613569	4575425	0.466163	630.498	4.24	5.7	2.7
26	CGVR133	IV	614782	4576248	0.227946	224.595	4.64	4.3	2.4
27	CGVR16A	IV	621424	4578908	0.18826	235.281	5.8	5.3	1.5
28	CGVR29	IV	606825	4576664	0.0875276	208.053	5.37	9.8	10.4
29	CGVR30	IV	626761	4579527	0.157275	412.006	6.11	11	10.2
30	CGVR32	IV	624549	4571882	0.101244	110.308	5.6	4.5	13.3
31	CGVR49	IV	627349	4571846	0.0280881	98.5705	6.31	14.4	22.4
32	CGVR1	III	609432	4571897	0.0459404	87.0183	5.61	7.7	52
33	CGVR3	III	609703	4572395	0.0360456	65.691	7.14	7.4	57.5
34	CGVR12	III	618285	4579717	0.0143271	42.8346	5.84	12.2	13.6
35	CGVR15	III	620146	4580619	0.0862036	172.365	6.07	8.2	18
36	CGVR16	III	621345	4578749	0.134593	386.537	6.54	11.8	17.6
37	CGVR27	III	626978	4582332	0.0705391	171.613	5.72	9.9	10.9
38	CGVR28	III	627416	4582817	0.0338034	79.1762	6.1	9.5	12.7
39	CGVR83	III	633780	4575461	0.0177213	52.0964	5.7	12.3	7
40	CGVR122	III	632505	4576106	0.0137654	40.5308	5.22	12	14.9
41	CGVR22	IV	620723	4585402	0.173621	213.088	5.95	5.1	8.7
42	CGVR25	IV	608939	4583959	0.163626	362.415	5.82	9.1	10.4
43	CGVR31	IV	610705	4581510	0.0214761	94.2634	5.05	17.9	4.2
44	CGVP18	III	608253	4611440	0.121262	144.953	5.71	5.5	13.9
45	CGVP19	III	607807	4611417	0.0570764	91.9178	5.87	6.6	3.7
46	CGVP20	III	605863	4609950	0.104719	111.556	5.87	5	11.5
47	CGVR21	III	629423	4583331	0.0253717	78.1063	4.94	12.1	6.7
48	CGVR8	III	612686	4575093	0.0212949	84.8028	4.81	16.2	9.4
49	CGVR24	III	624808	4586890	0.0159021	39.4644	4.7	10.1	11
50	CGVR60	III	605631	4590009	0.139173	292.957	4.94	8.8	11.5
51	CGVR56	III	605755	4586309	0.153271	300.666	5.96	5.1	30.2
52	CGVR56	III	605755	4586309	0.157874	309.696	5.84	8.1	29.8
53	CGVR67	III	615978	4581753	0.0883654	128.95	6.33	6.1	39.2
54	CGVR76	III	614041	4588590	0.0137175	58.5374	6.97	17.3	26.5
55	CGVP4	III	606029	4594670	0.0164986	38.034	5.48	9.3	11.8
56	CGVR46	III	612503	4574874	0.017748	77.9967	5.08	17.8	6.5
57	CGVP13	IV	621556	4600471	0.151649	829.824	5.92	23	19
58	CGVP15	IV	609460	4600375	0.148076	351.823	4.82	9.7	6.8
59	CGVP16	IV	629610	4609718	0.133762	155.135	6.19	4.9	5.3
60	CGVP17	IV	628861	4609506	0.148188	227.086	5.89	6.4	8.3
61	CGVR40	IV	610360	4585896	0.336739	446.389	5.75	5.6	4.7
62	CGVR57	IV	605594	4579860	0.114754	168.27	5.2	6.2	12.4
63	CGVR43	IV	604711	4575105	0.107014	202.476	5.8	7.9	12.5
64	CGVR51	IV	605329	4579926	0.178336	235.209	4.57	5.6	3.4
65	CGVR62	IV	607580	4588495	0.229754	519.527	4.62	9.4	7.1
66	CGVR92A	II	636358	4572363	0.138125	205.466	2.56	5.7	22.7
67	CGVR96C	II	635537	4572076	0.335796	312.88	3.72	3.6	25.6
68	CGVR111	II	634908	4572170	0.328425	388.239	5.16	4.7	21.1
69	CGVR120	II	636134	4573483	0.327127	436.805	5.67	6	21.7
70	MA122	I	631290	4592980	0.282958	131.071	1.06	2.1	13.8
71	MA222	I	630076	4599045	0.593168	164.207	6.02	1.3	14.9
72	DGC1	I	630020	4588959	0.274558	138.496	4	2.3	16.5
73	DGC2	I	629987	4589115	0.550071	187.496	4.51	1.6	15.6
74	MA158	I	629648	4598079	0.138411	52.5012	2.02	1.8	15.5
75	MA67	I	626322	4598972	0.363611	125.676	4.47	1.5	17
76	MA17	I	630908	4597834	0.162638	86.5419	3.84	2.6	8
77	MA225	I	626408	4602909	0.0897579	37.2451	5.17	2.1	15.3
78	MA156	I	629416	4598201	0.0933205	65.3583	0.37	3.1	10.4
79	SXS1	I	629928	4589353	0.21527	161.341	1.58	3.3	5.6
80	MA125	I	628242	4600561	0.310112	61.4904	4.65	0.9	16.9
81	MA133	I	630198	4599986	0.168958	73.1013	3.35	1.8	12.2
82	MA136	I	627704	4600842	0.115027	39.7698	2.68	1.4	14.3
83	SQS1	I	631542	4593781	0.395083	176.278	0.05	1.9	0.5
84	SQS2	I	630688	4594049	0.517468	102.361	2.57	0.8	9.2
85	SQS3	I	636309	4590443	0.0790358	7.53435	0.72	0	0.7
86	MA22B	I	634001	4603178	0.100621	36.9745	7.69	1.6	21.4
87	MA22A	I	634001	4603178	0.0881922	33.2096	0.12	1.7	7.9
88	MA77	I	632094	4598739	0.563643	202.496	3.7	1.5	14.4
89	MA110	I	627337	4606492	0.305769	95.1376	3.85	1.4	12
90	CGVP14	I	622971	4600910	0.0352697	59.6955	4.73	7.9	23.4
91	MA117	I	629232	4596551	0.786994	280.602	3.95	1.6	25.9
92	MA126	I	623669	4594472	0.847348	223.814	2.38	1.2	25.7
93	MA165	I	625589	4597773	0.0742048	58.2844	3.38	3.7	24.6
94	MA146	I	624207	4594215	0.283971	26.3277	3.63	0	11.9
95	MA147	I	623828	4594420	0.198239	16.5353	2.12	0	0.6
96	SFN1	I	620012	4598738	0.116303	152.612	0.21	5.6	1.1
97	SFN2	I	618476	4597808	0.266416	148.266	0.38	2.8	3.5
98	CGVP8	I	608267	4601514	0.105722	36.8983	4.17	1.5	21.8
99	CGVP3	I	606764	4594551	0.233566	118.15	4.47	2.1	18.9
100	FMO1	I	632636	4585496	0.498897	178.012	4.76	1.5	20.3
101	FMO2	I	633185	4584957	0.770777	117.885	3.73	0.7	19.2
102	FMO3	I	633800	4584531	0.213312	75.3054	5.48	1.4	16.9
103	FMR1	I	632469	4585476	0.182591	91.3469	5	3.3	17
104	FMR2	I	632472	4585478	0.25973	159.344	1.13	2.5	15.2
105	FMR3	I	635085	4583668	0.554182	165.344	4.38	1.3	17.8
106	OVB1	I	632360	4585435	0.0996132	36.3419	5.33	1.4	20
107	OVB2	I	635102	4583621	0.141831	69.7496	4.28	1.9	19.8
108	OVB3	I	635178	4583382	0.279619	204.791	2.95	3	25.8
109	FPI1	I	631396	4582818	0.140911	49.2576	5.28	1.4	18.1
110	FPI2	I	631009	4583691	0.508071	194.546	4.98	1.5	19.1
111	FPI3	I	630666	4583506	0.0173853	8.54346	4.2	2	20
112	FPI4	I	629832	4584531	0.312975	116.638	6.49	1.5	20.5
113	MA217	I	631460	4583588	0.324649	120.386	3.58	1.5	14.9
114	CGVP5	I	605903	4592750	0.208062	59.847	3.8	1.1	19.6
115	MA216	I	630959	4585271	0.158314	67.0109	4.31	1.8	17
116	FDE1	I	632286	4584954	0.248689	93.0077	4	1.6	17.4
117	FDE3	I	629379	4586429	0.157066	81.8387	3.31	2	14.6
118	FDE4	I	629217	4586906	0.624351	139.814	3.62	1	17
119	CGVP1	I	611311	4592624	0.200025	200.607	5.36	4.2	5.8

## Sheet: Table S2
Table S2-Climate conditions, physical-chemical properties and radiological analysis in groundwater collection points.
ID	Name of the site	Water Type	Catchments Type	X	Y	Geology Group	Altitude (m)	Precipitation (mm.year-1)	Electric conductivity (µS.cm-1)	Temperature (ºC)	pH	222Rn (Bq.L-1)	HAC Class
LS1	Bairro dos Retornados	Non-Mineral water	Spring	614506	4595815	I	602	824.757	50.3	11.5	6.23	42.3001	1
LS2	Caminho Filhagosa	Non-Mineral water	Spring	619558	4596322	I	802	801.866	43.4	12.9	5.04	83.4122	1
LS3	Filhagosa Aldeia	Non-Mineral water	Spring	619810	4595473	I	815	726.572	32.6	14.7	5.32	59.3586	1
LS4	Lagoa antes da aldeia	Non-Mineral water	Spring	622482	4600160	I	1053	747.162	32	11.9	5.5	37.4436	1
LS5	Bornes de Aguiar	Non-Mineral water	Spring	617731	4598375	I	915	628.922	53.3	11.7	5.6	251.874	1
LS6	Caminho para Bornes	Non-Mineral water	Spring	617201	4598906	I	888	1094.4	28.7	15.3	6.25	14.3992	2
LS7	Barbadães de baixo	Non-Mineral water	Spring	620048	4601357	V	779	1045.33	32.7	12.9	5.63	299.092	2
LS8	Barbadães de cima	Non-Mineral water	Spring	621328	4601646	V	858	1066.87	40.3	11.4	5.85	444.569	2
LS9	Antes da povoação de Lagoa	Non-Mineral water	Spring	622671	4600359	I	782	1003	44.1	16.1	5.87	58.7138	2
LS10	Eiriz	Non-Mineral water	Spring	619029	4600790	V	702	833.331	71.6	14.1	6.54	206.492	1
LS11	Soutelinho do Monte	Non-Mineral water	Spring	620115	4603740	V	714	1394.81	52.1	16.9	6	748.837	2
LS12	Valoura	Non-Mineral water	Spring	621584	4602615	V	478	1106.96	72.5	12.1	6.22	334.467	2
LS13	Soutelo de Matos	Non-Mineral water	Spring	610964	4601950	IV	841	1037.79	19.1	11.7	6.7	40.0079	2
LS14	Rebordochão	Non-Mineral water	Spring	614809	4600004	V	798	1322.78	75.3	17.8	6.86	141.941	2
LS15	Aldeia Vila Meã	Non-Mineral water	Spring	616242	4598185	V	707	1317.75	36.7	15.8	6	45.9158	2
LS16	Cidadelha de Aguiar	Non-Mineral water	Spring	612937	4596628	V	724	1159.74	21.2	16.2	5.7	50.8547	2
LS17	Carrazedo do Alvão	Non-Mineral water	Spring	607175	4595680	I	970	1322.78	30.4	12.1	5.59	250.434	2
LS18	Campo de jales	Non-Mineral water	Spring	616662	4593105	IV	1002	1262.81	31.1	10.3	5.56	628.309	2
LS19	Raiz do Monte	Non-Mineral water	Spring	616518	4591293	III	879	1266.25	54.4	12.7	5.3	792.742	2
LS20	Quintã de jales	Non-Mineral water	Spring	614929	4588011	III	878	1489.77	18.1	13.9	5.3	342.328	2
LS21	Guilhado	Non-Mineral water	Spring	615182	4594287	IV	1035	1288.23	21.2	13	5.06	836.004	2
LS22	Soutelo de Aguiar	Non-Mineral water	Spring	611045	4592758	V	800	1256.02	57	14.7	6.22	201.297	2
LS23	Zimão	Non-Mineral water	Spring	612157	4589137	IV	753	1148.79	21.7	13	6.3	30.6042	2
LS24	Tourencinho	Non-Mineral water	Spring	611716	4588623	III	720	1911	22	20.8	5.68	195.662	2
LS25	Gralheira	Non-Mineral water	Spring	611785	4588634	III	716	1468.04	30.7	15	5.33	229.617	2
LS26	Parada	Non-Mineral water	Spring	613962	4591275	IV	881	1553.2	30.6	10.8	5.59	471.652	2
LS27	Pontido	Non-Mineral water	Spring	610186	4591078	V	1078	1551.82	27.3	15.3	5.9	178.42	2
LS28	Telões (casa particular)	Non-Mineral water	Spring	609990	4590547	V	723	1349.99	86	13.2	5.99	293.681	2
LS29	Souto	Non-Mineral water	Spring	608649	4588784	IV	706	1351.27	24.3	21.3	5.4	716.602	2
LS30	Outeiro	Non-Mineral water	Spring	608303	4588644	IV	743	1294.04	44.1	12.2	5	384.153	2
LS31	Samardã Vila Real	Non-Mineral water	Spring	607555	4584998	IV	778	1294.04	90.2	14.2	5.04	645.37	2
LS32	São Cosme	Non-Mineral water	Spring	610006	4578113	III	698	1294.04	47.8	12.3	5.42	603.858	2
LS33	Hotel Sénior das Romanas Pedras Salgadas	Non-Mineral water	Spring	615991	4602115	V	702	1573.91	140.3	14.9	6.29	89.9463	2
LS34	Cardal Poço 85 Água mineralizada PS	Mineral water	Dug well	617880	4602119	V	594	1571.03	751	18.8	8.73	0.642272	3
LS35	Nascente termal chaves Hotel Aquae Fluviae	Mineral water	Spring	627108	4621977	I	354	1571.03	2520	58.8	6.52	8.41763	3
LS36	Segirei Água Mineralizada	Mineral water	Spring	649728	4636887	I	458	1443.26	2200	18.6	6.43	24.9199	3
LS37	Furo AC2 Sendim	Mineral water	Borehole	649488	4635586	I	438	1803.63	1423	15.4	6.07	49.2499	3
LS38	Ribeirinha Mirandela	Mineral water	Spring	652340	4612131	I	284	1139.87	1008	18.9	7.39	172.159	3
LS39	Torre D. chama Fornos de Ledra	Mineral water	Spring	657820	4617531	III	396	1249.56	382	17.8	7.06	2750.08	4
LS40	Marmelos Mirandela	Mineral water	Dug well	651304	4588407	I	306	1093.41	288	16.8	6.23	9.72187	2
LS41	Franzilhal Alijó	Mineral water	Spring	636525	4573557	II	163	1420.52	485	24.5	7.83	3687.68	4
LS42	Franzilhal 2 Alijó	Mineral water	Spring	635427	4572796	III	244	1642.12	364	26.4	7.87	1419.15	4
LS43	Caldas de carlão Murça	Mineral water	Spring	636422	4576815	III	401	537.951	474	29.6	8.14	42.3453	3
LS44	Quinta dos donos das termas carlão I Murça	Mineral water	Spring	634747	4577365	I	213	1149.19	430	19.8	7.5	46.9163	3
LS45	Quinta dos donos das termas carlão II Murça	Mineral water	Spring	636135	4577177	III	270	1203.43	499	22.6	8.53	38.8728	3
LS46	Caldas de S. Lourenço I Carrazeda de Ansiães	Mineral water	Borehole	636355	4572416	III	379	1420.55	408	27.5	8.27	1900.74	4
LS47	Caldas de S. Lourenço II Carrazeda de Ansiães	Mineral water	Borehole	636330	4572519	II	379	1492.66	408	31.1	8.29	1423.16	4
LS48	Antigas Caldas de S. Lourenço CA	Mineral water	Spring	635865	4572247	II	226	1552.92	436	28.5	7.91	1997.84	4
LS49	Fonte Santa Seixo de Ansiães	Mineral water	Spring	645227	4556515	I	228	1124.92	728	22.4	7.92	105.145	3
LS50	Caldas do Moledo I Mesão Frio	Mineral water	Borehole	597604	4556801	I	54	1341.76	337	43	8.86	38.3989	3
LS51	Caldas do Moledo II Mesão Frio	Mineral water	Borehole	597808	4556757	I	65	1396.05	335	40	8.9	20.5161	3
LS52	Vila Nova	Non-Mineral water	Spring	606189	4571066	I	440	657.939	190.3	13.6	5.98	74.5695	1
LS53	Folhadela	Non-Mineral water	Spring	605674	4571036	I	465	453.571	274	16.3	5.87	111.591	1
LS54	UTAD	Non-Mineral water	Spring	605898	4571541	I	468	673.387	266	15.4	6.03	80.5512	1
LS55	Bairro do ferreiros	Non-Mineral water	Spring	605643	4572692	I	413	1503.97	248	15	5.72	137.42	2
LS56	Parque Florestal	Non-Mineral water	Spring	605585	4572963	I	419	1410.83	330	16.5	5.6	440.086	2
LS57	Jardim da carreira	Non-Mineral water	Spring	605461	4573078	IV	434	1463.89	291	16.6	6.1	142.048	2
LS58	São Mamede	Non-Mineral water	Spring	605006	4573985	IV	445	1412.72	343	15.7	4.98	1384.85	2
LS59	Borbela 2	Non-Mineral water	Borehole	605992	4575057	IV	465	1428.66	91.5	17.5	5.75	866.513	2
LS60	Furo particular Lordelo	Non-Mineral water	Borehole	603681	4575506	IV	446	1263.89	112.4	17.2	6.2	164.753	2
LS61	Lordelo Vila real Nascente particular	Non-Mineral water	Spring	604163	4574531	I	384	1406.45	80	15	5.87	238.594	2
LS62	Centro cultural de Lordelo	Non-Mineral water	Spring	603320	4574837	I	422	1649.88	143.4	16.3	5.78	151.618	2
LS63	Borbelinha	Non-Mineral water	Spring	605407	4576532	I	508	2275.37	320	20.1	4.65	24.5147	2
LS64	Quinta do prof. Coke Vila Real	Non-Mineral water	Borehole	605603	4575719	IV	442	1074.32	208	16.9	5.87	677.002	2
LS65	Mateus (casa particular)	Non-Mineral water	Borehole	607883	4573121	IV	519	607.053	235	16.8	6.17	642.102	1
LS66	Mateus 2 (casa particular)	Non-Mineral water	Borehole	607368	4572746	I	495	729.858	159	16.7	6.05	61.6609	1
LS67	S. Bento	Non-Mineral water	Spring	610247	4581537	IV	715	1157.83	20.1	19.1	5.78	125.168	2
LS68	Fortunho	Non-Mineral water	Spring	608944	4579477	III	628	1157.83	24.7	18.3	6.1	116.355	2
LS69	Águas Santas	Non-Mineral water	Spring	612553	4580973	IV	829	1157.83	28.2	16.4	5.45	445.007	2
LS70	Linhares	Non-Mineral water	Spring	612866	4579930	IV	830	1207.2	26.6	14.6	5.5	958.427	2
LS71	Leirós	Non-Mineral water	Spring	613486	4579051	III	811	1260.98	26.9	19.7	5.45	492.359	2
LS72	Sanguinhedo	Non-Mineral water	Spring	612221	4577540	III	737	1549.28	32.1	13.3	5.84	308.507	2
LS73	Santuário Sra da Pena	Non-Mineral water	Spring	611132	4574939	I	701	1312.97	41.9	16.9	5.4	1012.91	2
LS74	Lamares casa particular	Non-Mineral water	Borehole	614771	4576230	III	825	1412.73	205	17.9	5.61	856.42	2
LS75	Justes	Non-Mineral water	Spring	615705	4578673	III	784	1286.89	70.5	12.9	5.52	389.878	2
LS76	Casa particular	Non-Mineral water	Spring	613315	4594734	V	725	1224.45	164	14.5	5.88	86.381	2
LS77	Benagouro	Non-Mineral water	Spring	607370	4580840	IV	619	1179.87	119.8	15.7	5.58	1381.57	2
LS78	Escariz	Non-Mineral water	Spring	607124	4579318	I	578	1370.48	58.5	14	5.89	574.993	2
LS79	Paredes	Non-Mineral water	Spring	606386	4579824	IV	687	1405.09	107	14.5	5.5	535.434	2
LS80	Parque natural do alvão	Non-Mineral water	Spring	601566	4578012	V	1043	1227.26	26.5	10.7	5.67	534.013	2
LS81	Aldeia de paredes lamares	Non-Mineral water	Spring	616708	4576008	III	732	1057.92	26.4	17.7	5.89	225.003	2
LS82	Santuário Sra da Saúde I	Non-Mineral water	Spring	617981	4574809	III	679	1057.92	49.8	12.8	5.12	1459.14	2
LS83	Santuário Sra da Saúde II	Non-Mineral water	Spring	617972	4574804	III	681	901.864	51.6	13.2	5.17	1520.69	2
LS84	São Lourenço de Ribapinhão	Non-Mineral water	Spring	618590	4575830	I	558	1434.16	56	13.7	5.9	34.6115	2
LS85	Gache	Non-Mineral water	Spring	613638	4574916	III	798	1305.26	63.7	15.1	5.42	1222.71	2
LS86	Ludares	Non-Mineral water	Spring	613554	4572904	III	691	979.373	173.2	16.5	5.24	604.835	2
LS87	Vale de Nogueiras	Non-Mineral water	Spring	610729	4572175	III	639	597.067	94.1	15.2	5.4	590.873	1
LS88	São Cibrão	Non-Mineral water	Spring	619021	4571944	III	595	597.067	53.6	13.9	5.21	621.986	1
LS89	Vilar de maçada	Non-Mineral water	Spring	620457	4576218	I	573	597.067	67.5	15.2	5.2	598.537	1
LS90	Vila Verde	Non-Mineral water	Spring	621181	4580294	III	669	1239.48	250	16.9	6.6	130.604	2
LS91	Perafita	Non-Mineral water	Spring	622159	4583234	IV	741	1239.48	27.7	15.4	5.4	409.101	2
LS92	CarvaFonte da poça	Non-Mineral water	Spring	620743	4585926	IV	772	1180.65	149	12.4	5.53	655.626	2
LS93	Alfarela de jales	Non-Mineral water	Spring	619449	4589248	III	843	1330.37	112.3	15.9	5.52	163.466	2
LS94	Campo de jales Fonte nova	Non-Mineral water	Spring	618241	4591000	I	842	1073.49	123.8	12.3	5.18	399.128	2
LS95	Cidadelha de Jales	Non-Mineral water	Spring	619665	4591298	I	791	932.948	46.1	22.3	5.54	56.3318	2
LS96	Veia de Jales	Non-Mineral water	Spring	617999	4588469	IV	877	1100.79	37.9	13.2	5.37	548.993	2
LS97	Pinhão Cel	Non-Mineral water	Spring	615056	4582008	III	777	581.125	24.7	15	5.95	225.736	1
n	97
µ							634.093	1206.91	212.473	17.1546	6.06351	473.907
σ							226.005	317.745	381.994	6.87702	0.945066	598.387
Min.							54	453.571	18.1	10.3	4.65	0.642272
Máx							1078	2275.37	2520	58.8	8.9	3687.68
n	97
µ ± σ							860.097	1206.91	212.473	17.1546	6.06351	473.907
Min.							54	453.571	18.1	10.3	4.65	0.642272
Máx							1078	2275.37	2520	58.8	8.9	3687.68

## Sheet: Table S3
Table S3- Hydraulic turnover time of spring water in Vila Pouca de Aguiar Municipality.
ID	FID_Lisa	Geology Group	Name of the site	ln(a1)	ln(a3)	Q (L/min)	Q (m^3/s)	EXP (a1)	EXP (a3)	t (seg)	t(years)
11	LS11	V	Soutelinho do Monte	-17.5	-3.5	35.5775	0.000592958	2.511e-08	0.0301974	1.21264e+08	3.84527
18	LS7	V	Barbadães de Baixo	-17.25	-3	50.0438	0.000834064	3.22419e-08	0.0497871	5.92513e+07	1.87885
27	LS5	I	Bornes de Aguiar	-16.75	-1.5	22.227	0.000370451	5.31579e-08	0.22313	4.90763e+07	1.5562
144	LS21	IV	Guilhado	-17	-3	30.9154	0.000515256	4.13994e-08	0.0497871	8.46422e+07	2.68399
189	LS18	IV	Campo de Jales	-17	-6	194.528	0.00324214	4.13994e-08	0.00247875	6.02865e+07	1.91167
161	LS22	V	Soutelo de Aguiar	-18	-4	54.8383	0.000913972	1.523e-08	0.0183156	1.29709e+08	4.11306
196	LS26	V	Parada	-18.5	-4	53.1695	0.000886158	9.23745e-09	0.0183156	1.71778e+08	5.44704
4	LS8	V	Barbadães de Cima	-19.75	-4.25	29.3826	0.00048971	2.64657e-09	0.0142642	6.58052e+08	20.8667
9	LS12	V	Valoura	-19	-3.75	26.8387	0.000447312	5.6028e-09	0.0235177	3.85615e+08	12.2278
16	LS10	V	Eiriz	-19.5	-3	14.9113	0.000248522	3.39827e-09	0.0497871	6.1251e+08	19.4226
34	LS6	I	São Martinho	-17.5	-1	12.6519	0.000210866	2.511e-08	0.367879	9.76975e+07	3.09797
58	LS2	I	Filhagosa	-17.5	-1.5	13.2084	0.00022014	2.511e-08	0.22313	1.20161e+08	3.81029
61	LS3	I	Filhagosa 2	-17.5	-1.5	14.2851	0.000238084	2.511e-08	0.22313	1.11105e+08	3.5231
112	LS13	IV	Soutelo do Mato	-19	0.75	6.90725	0.000115121	5.6028e-09	2.117	1.57924e+08	5.00774
123	LS14	V	Rebordochão	-19	-5	63.4019	0.0010567	5.6028e-09	0.00673795	3.04963e+08	9.67033
136	LS25	III	Gralheira	-18.5	-2	12.6705	0.000211176	9.23745e-09	0.135335	2.6518e+08	8.40879
143	LS24	III	Tourencinho	-18	-5	50.367	0.000839451	1.523e-08	0.00673795	2.32839e+08	7.38329
148	LS23	IV	Zimão	-17	-6	87.1561	0.0014526	4.13994e-08	0.00247875	1.34557e+08	4.26676
174	LS1	I	Bairro Retornados VPA	-18	-4	43.1346	0.000718911	1.523e-08	0.0183156	1.64903e+08	5.22905
180	LS15	V	Vila Meã	-18.5	-3.5	47.6451	0.000794086	9.23745e-09	0.0301974	1.49292e+08	4.73402
234	LS20	III	Quintã de Jales	-19	-5.5	63.2726	0.00105454	5.6028e-09	0.00408677	3.92381e+08	12.4423
288	LS17	I	Carrazedo do Alvão	-19.5	-2	12.6663	0.000211105	3.39827e-09	0.135335	4.37354e+08	13.8684
206	LS9	I	Lagoa (deposit)	-19.5	-3.5	19.4054	0.000323423	3.39827e-09	0.0301974	6.04339e+08	19.1635
207	LS4	I	Lagoa 2 (spring)	-18.5	-3	13.0109	0.000216848	9.23745e-09	0.0497871	4.25771e+08	13.5011
276	LS16	V	Cidadelha de Aguiar	-21.5	-6.5	63.6202	0.00106034	4.59906e-10	0.00150344	2.24566e+09	71.2094
Symbols: ID is the identification code of the collecting site; a1 and a3 are intercept-y of the dashed lines; t is the hydraulic turnover time of spring water (Eq. 1).

## Sheet: Graph S1
Graph S1. An example of Brutsaert method application to collecting site Id LS21.
Date	Time (days)	t(s)	Q (L/min)	Q (m3/s)	ln Q	ln (dQ/dt)	T	Cond	pH			A(B=1)	A(B=3)	Factor Morfológico (FM_K, FM_ne)	K,ne
2007-07-03	0	0	37.5	0.000625			12.6	26	4.85			4.13994e-08	0.0497871	0.000614088	3.20306e-07
2007-07-17	14	1209600	25	0.000416667	-7.56008	-22.4822	12.9	17.6	5.15			4.13994e-08	0.0497871	5.56724e-07	0.0122627
2007-10-28	117	10108800	17.1429	0.000285714	-7.95418	-24.9421	11.4	18.1	5.2
2007-11-30	150	12960000	14	0.000233333	-8.25666	-24.7202	7.8	19	5.3
2007-12-29	179	15465600	11.6129	0.000193548	-8.45215	-24.8661	6.1	19.9	4.84
2008-01-27	208	17971200	31.1111	0.000518519	-7.94049	-22.7658	7.8	19.5	4.86
7 de Abril	278	24019200	52.5	0.000875	-7.26907	-23.5545
4 de Maio	305	26352000	60	0.001	-6.97229	-23.6498
											A bacia	141248
											V bacia	3.54934e+06
											L linhas água	603.55
											FM_K	0.000614088
											FM_n2	5.56724e-07
											1 km
												A(B=1)	A(B=3)	Factor Morfológico (FM_K, FM_ne)	K,ne
Média			31.1084									4.13994e-08	0.0497871	0.00064848	3.38245e-07
												4.13994e-08	0.0497871	4.9896e-09	0.000109903
											A bacia	4.49495e+06
											V bacia	3.96024e+08
											L linhas água	944.97
											FM_K	0.00064848
											FM_n2	4.9896e-09

## Sheet: Table S4
					Table S4- PLS dataset of Cluster C1 composed by metasediments and granites.
ID	Site	Type	X	Y	Geology Group	HAC Class	Altitude (m)	Precipitation (mm.year-1)	Electric conductivity (µS.cm-1)	Temperature (ºC)	pH	222Rn (Bq.L-1)	PRn (Bq.m-3.h-1)	CE (%)	K2O (%)	Th (ppm)	U(ppm)	Fracturing density (km.km-2)
LS4	Lagoa antes da aldeia	spring	622482	4600160	I	1	1053	747.16	32	11.9	5.5	37	208.24	0.138892	4.368	15.9008	5.19235	2.38961
LS10	Eiriz	spring	619029	4600790	V	1	702	833.33	71.6	14.1	6.54	206	313.227	0.177485	4.60906	14.5292	9.38672	0.976205
LS5	Bornes de Aguiar	spring	617731	4598375	I	1	915	628.92	53.3	11.7	5.6	252	206.073	0.211373	4.55528	13.3608	7.13519	1.79096
LS1	Bairro dos Retornados	spring	614506	4595815	I	1	602	824.76	50.3	11.5	6.23	42	163.255	0.192624	4.7872	14.9463	5.58738	1.89753
LS2	Caminho Filhagosa	spring	619558	4596322	I	1	802	801.87	43.4	12.9	5.04	83	147.519	0.213446	4.26118	13.861	3.2119	0.569193
LS3	Filhagosa- Aldeia	spring	619810	4595473	I	1	815	726.57	32.6	14.7	5.32	59	138.199	0.216028	4.19417	14.5823	2.66614	1.69272
LS97	Pinhão Cel	spring	615056	4582008	III	1	777	581.13	24.7	15	5.95	226	135.025	0.0913324	5.72709	16.6028	9.62328	1.37755
LS89	Vilar de Maçada	spring	620457	4576218	I	1	573	597.07	67.5	15.2	5.2	599	186.897	0.123648	5.63833	14.7815	8.75506	2.33286
LS65	Mateus (casa particular)	Borehole	607883	4573121	IV	1	519	607.05	235	16.8	6.17	642	110.577	0.0730554	5.67468	16.9592	8.67538	2.2248
LS66	Mateus 2 (casa particular)	Borehole	607368	4572746	I	1	495	729.86	159	16.7	6.05	62	120.479	0.0807255	5.67773	16.2729	8.18832	1.70593
LS87	Vale de Nogueiras	Borehole	610729	4572175	III	1	639	597.07	94.1	15.2	5.4	591	100.324	0.061245	5.27604	18.3762	11.3314	0.396645
LS88	São Cibrão	Spring	619021	4571944	III	1	595	597.07	53.6	13.9	5.21	622	156.862	0.129584	5.20876	14.9617	8.64148	2.68956
		n						12
		µ					707.25	689.322	76.425	14.1333	5.68417	285.083	165.556	0.142453	4.99813	15.4279	7.36622	1.6703
		σ					162.026	93.8876	59.0047	1.74324	0.465429	242.594	55.6195	0.0557628	0.574522	1.36849	2.55174	0.693591
		Med					670.5	677.745	53.45	14.4	5.55	216	152.19	0.134238	4.99798	14.954	8.4149	1.74845
		CV					0.229093	0.136203	0.77206	0.123343	0.0818817	0.850959	0.335955	0.391447	0.114947	0.0887026	0.346412	0.41525
		Min.					495	581.13	24.7	11.5	5.04	37	100.324	0.061245	4.19417	13.3608	2.66614	0.396645
		Máx					1053	833.33	235	16.8	6.54	642	313.227	0.216028	5.72709	18.3762	11.3314	2.68956

## Sheet: Table S5
Table S5-Correlation matrix of Cluster C1 dataset.
Altitude (m)	Precipitation (mm.year-1)	Electric conductivity (µS.cm-1)	Temperature (ºC)	pH	222Rn (Bq.L-1)	PRn (Bq.m-3.h-1)	CE (%)	K2O (%)	Th (ppm)	U(ppm)	Fracturing density (km.km-2)
1	0.19441	-0.642174	-0.65861	-0.283248	-0.498131	0.354501	0.501644	-0.708469	-0.337452	-0.481071	-0.0720899	Altitude (m)
0.19441	1	-0.203967	-0.430615	0.317068	-0.761397	0.459225	0.594559	-0.64622	-0.414107	-0.568537	-0.266321	Precipitation
-0.642174	-0.203967	1	0.684576	0.402345	0.414789	-0.347809	-0.580392	0.553796	0.46737	0.370348	0.106644	Electric conductivity (µS.cm-1)
-0.65861	-0.430615	0.684576	1	0.153481	0.454987	-0.446581	-0.711857	0.716987	0.578467	0.477055	-0.0467171	Temperature
-0.283248	0.317068	0.402345	0.153481	1	-0.19335	0.310469	-0.166666	0.235287	0.187589	0.329686	-0.0384759	pH
-0.498131	-0.761397	0.414789	0.454987	-0.19335	1	-0.229547	-0.556904	0.590402	0.370897	0.666471	0.199928	222Rn
0.354501	0.459225	-0.347809	-0.446581	0.310469	-0.229547	1	0.472124	-0.424836	-0.551788	-0.00835237	0.0367788	PRn
0.501644	0.594559	-0.580392	-0.711857	-0.166666	-0.556904	0.472124	1	-0.851733	-0.887823	-0.754839	-0.0679614	CE
-0.708469	-0.64622	0.553796	0.716987	0.235287	0.590402	-0.424836	-0.851733	1	0.601741	0.753215	0.204885	K2O
-0.337452	-0.414107	0.46737	0.578467	0.187589	0.370897	-0.551788	-0.887823	0.601741	1	0.585227	-0.159073	Th
-0.481071	-0.568537	0.370348	0.477055	0.329686	0.666471	-0.00835237	-0.754839	0.753215	0.585227	1	-0.078396	U
-0.0720899	-0.266321	0.106644	-0.0467171	-0.0384759	0.199928	0.0367788	-0.0679614	0.204885	-0.159073	-0.078396	1	Fracturing density (km.km-2)

## Sheet: Table S6
Table S6- External VIF´s of Cluster C1 measured variables.
Measured variables	External VIF
222Rn	1
CE	1
Electric conductivity	2.3
Fracturing density	1
K2O	2.5
PRn	1
Rainfall	1
Temperature	1.9
Th	1.7
U	2.5
mdt	1
pH	1.2

## Sheet: Table S7
Table S7: Internal VIF´s of Cluster C1 latent variables.
Latent variables	Altitude	Dilution	Geochemistry	Hydrosphere	Migration	Mineralogy texture	Radon contamination in groundwater	Radon production potential
Altitude				1.1			1.6	1.4
Dilution				1.3			1.6	1.8
Geochemistry								1.7
Hydrosphere							2.4
Migration							1.1	1.1
Mineralogy texture								3
Radon contamination on groundwater
Radon prodution potential				1.4			1.7

## Sheet: Table S8
					Table S8- PLS dataset of Cluster C2 composed by metasediments and granites.
ID	Site	Type	X	Y	Geology Group	HAC Class	Altitude (m)	Precipitation (mm.year-1)	Electric conductivity (µS.cm-1)	Temperature (ºC)	pH	222Rn (Bq.L-1)	PRn (Bq.m-3.h-1)	CE (%)	K2O (%)	Th (ppm)	U(ppm)	Fracturing density (km.km-2)
LS11	Soutelinho do Monte	Spring	620115	4603740	V	2	714	1394.81	52.1	16.9	6	749	225.758	0.15302	4.80024	15.0038	10.2559	1.10362
LS8	Barbadães de cima	Spring	621328	4601646	V	2	858	1066.87	40.3	11.4	5.85	445	254.876	0.138552	4.63551	15.5816	8.58521	1.81142
LS12	Valoura	Spring	621584	4602615	V	2	478	1106.96	72.5	12.1	6.22	334	216.028	0.142219	4.65462	15.3956	8.03065	1.56975
LS13	Soutelo de Matos	Spring	610964	4601950	IV	2	841	1037.79	19.1	11.7	6.7	40	183.475	0.145061	4.96116	14.7895	7.67178	1.89017
LS33	Hotel Sénior das Romanas	Spring	615991	4602115	V	2	702	1573.91	140.3	14.9	6.29	90	344.522	0.185405	4.83218	16.905	10.7139	1.19423
LS7	Barbadães de baixo	Spring	620048	4601357	V	2	779	1045.33	32.7	12.9	5.63	299	297.806	0.157977	4.6502	14.913	9.44071	0.95425
LS9	Antes da povoação de Lagoa	Spring	622671	4600359	I	2	782	1003	44.1	16.1	5.87	59	195.577	0.134861	4.38054	16.0392	5.04442	2.13413
LS14	Rebordochão	Spring	614809	4600004	V	2	798	1322.78	75.3	17.8	6.86	142	291.112	0.200134	4.75168	15.557	8.47942	0.773009
LS6	Caminho para Bornes	Spring	617201	4598906	I	2	888	1094.4	28.7	15.3	6.25	14	234.184	0.213789	4.59634	14.1611	7.44605	1.71526
LS15	Aldeia Vila Meã	Spring	616242	4598185	V	2	707	1317.75	36.7	15.8	6	46	209.62	0.212887	4.62467	14.6576	6.76226	0.816867
LS16	Cidadelha de Aguiar	Spring	612937	4596628	V	2	724	1159.74	21.2	16.2	5.7	51	175.099	0.196001	4.71819	14.9498	5.32955	2.66653
LS17	Carrazedo do Alvão	Spring	607175	4595680	I	2	970	1322.78	30.4	12.1	5.59	250	113.045	0.136902	4.90185	15.0878	4.10912	1.70541
LS21	Guilhado	Spring	615182	4594287	IV	2	1035	1288.23	21.2	13	5.06	836	153.625	0.181908	4.84394	14.9458	5.33069	1.23897
LS76	Casa particular	Spring	613315	4594734	V	2	725	1224.45	164	14.5	5.88	86	163.021	0.180048	4.90907	14.8249	5.57809	1.66542
LS18	Campo de jales	Spring	616662	4593105	IV	2	1002	1262.81	31.1	10.3	5.56	628	148.332	0.173862	4.84186	14.9602	4.2026	2.40139
LS22	Soutelo de Aguiar	Spring	611045	4592758	V	2	800	1256.02	57	14.7	6.22	201	205.555	0.174388	5.10958	14.2086	7.34575	1.2171
LS19	Raiz do Monte	Spring	616518	4591293	III	2	879	1266.25	54.4	12.7	5.3	793	137.434	0.14291	5.10274	15.0035	4.78339	2.98689
LS26	Parada	Spring	613962	4591275	iV	2	881	1553.2	30.6	10.8	5.59	472	136.134	0.134001	5.30386	15.0649	7.63497	2.36207
LS27	Pontido	Spring	610186	4591078	V	2	1078	1551.82	27.3	15.3	5.9	178	282.119	0.167719	5.19884	15.8008	8.33876	0.823418
LS28	Telões (casa particular)	Spring	609990	4590547	V	2	723	1349.99	86	13.2	5.99	294	310.782	0.166393	5.26981	16.2352	8.62073	1.31815
LS94	Campo de jales -Fonte nova	Spring	618241	4591000	I	2	842	1073.49	123.8	12.3	5.18	399	145.486	0.148061	4.9598	14.9656	3.70543	1.45982
LS95	Cidadelha de Jales	Spring	619665	4591298	I	2	791	932.95	46.1	22.3	5.54	56	144.959	0.16809	4.67649	14.9607	2.87078	2.69786
LS20	Quintã de jales	Spring	614929	4588011	III	2	878	1489.77	18.1	13.9	5.3	342	114.6	0.0893681	5.60728	15.8947	8.6685	2.31127
LS23	Zimão	Spring	612157	4589137	IV	2	753	1148.79	21.7	13	6.3	31	178.389	0.120328	5.49956	15.4423	9.39268	3.30864
LS24	Tourencinho	Spring	611716	4588623	III	2	720	1911	22	20.8	5.68	196	210.664	0.132815	5.52114	15.2708	9.80311	3.01875
LS25	Gralheira	Spring	611785	4588634	III	2	716	1468.04	30.7	15	5.33	230	202.521	0.130032	5.52965	15.3116	9.79371	3.38487
LS29	Souto	Spring	608649	4588784	IV	2	706	1351.27	24.3	21.3	5.4	717	391.13	0.173366	5.30269	16.135	9.42994	1.57119
LS30	Outeiro	Spring	608303	4588644	IV	2	743	1294.04	44.1	12.2	5	384	397.028	0.174846	5.30133	15.7692	9.51725	1.64263
LS93	Alfarela de jales	Spring	619449	4589248	III	2	843	1330.37	112.3	15.9	5.52	163	151.651	0.14249	5.15526	14.949	5.33917	0.657243
LS96	Vreia de Jales	Spring	617999	4588469	IV	2	877	1100.79	37.9	13.2	5.37	549	145.063	0.123638	5.43524	14.9772	6.59611	0.10785
LS92	Carva-Fonte da povoação	Spring	620743	4585926	IV	2	772	1180.65	149	12.4	5.53	656	164.34	0.123286	5.55268	14.207	6.74169	1.11786
LS31	Samardã	Spring	607555	4584998	IV	2	778	1294.04	90.2	14.2	5.04	645	295.301	0.163011	5.37319	14.9255	8.71222	1.94108
LS67	S. Bento	Spring	610247	4581537	IV	2	715	1157.83	20.1	19.1	5.78	125	153.343	0.0851013	5.50838	13.6933	9.16281	0.902291
LS91	Perafita	Spring	622159	4583234	IV	2	741	1239.48	27.7	15.4	5.4	409	172.398	0.106004	5.80687	14.8313	8.72446	1.4221
LS69	Águas Santas	Spring	612553	4580973	IV	2	829	1157.83	28.2	16.4	5.45	445	136.56	0.0894819	5.62002	14.5556	9.44074	1.08741
LS70	Linhares	Spring	612866	4579930	IV	2	830	1207.2	26.6	14.6	5.5	958	137.55	0.0874661	5.54512	14.8364	9.56961	1.03048
LS77	Benagouro	Spring	607370	4580840	IV	2	619	1179.87	119.8	15.7	5.58	1382	176.831	0.119563	5.41585	14.5696	7.88169	2.57961
LS79	Paredes	Spring	606386	4579824	IV	2	687	1405.09	107	14.5	5.5	535	183.497	0.120787	5.40525	13.8045	7.0375	2.64673
LS90	Vila Verde	Spring	621181	4580294	III	2	669	1239.48	250	16.9	6.6	131	202.803	0.109913	5.90247	14.3021	9.10297	1.77354
LS68	Fortunho	Spring	608944	4579477	III	2	628	1157.83	24.7	18.3	6.1	116	131.093	0.0952096	5.37305	17.1945	8.66885	1.73213
LS32	São Cosme	Spring	610006	4578113	III	2	698	1294.04	47.8	12.3	5.42	604	108.612	0.073115	5.41852	18.8789	9.44558	1.45309
LS71	Leirós	Spring	613486	4579051	III	2	811	1260.98	26.9	19.7	5.45	492	150.498	0.0890918	5.40997	14.8369	10.2637	0.76547
LS72	Sanguinhedo	Spring	612221	4577540	III	2	737	1549.28	32.1	13.3	5.84	309	148.831	0.0742638	5.28434	14.6999	11.3318	1.82977
LS75	Justes	Spring	615705	4578673	III	2	784	1286.89	70.5	12.9	5.52	390	146.246	0.0951648	5.45128	14.808	10.1504	1.74499
LS78	Escariz	Spring	607124	4579318	I	2	578	1370.48	58.5	14	5.89	575	170.859	0.107643	5.43183	14.9047	7.664	2.49497
LS63	Borbelinha	Spring	605407	4576532	I	2	508	2275.37	320	20.1	4.65	25	183.344	0.110783	5.40948	14.295	7.65225	3.18901
LS64	Borbela	Dug Well	605603	4575719	IV	2	442	1074.32	208	16.9	5.87	677	175.945	0.108503	5.40637	14.3359	7.55147	2.80388
LS74	Lamares- casa particular	Dug Well	614771	4576230	III	2	825	1412.73	205	17.9	5.61	856	213.522	0.123514	5.01477	12.5126	12.7511	1.15224
LS81	Aldeia de paredes- Lamares	Spring	616708	4576008	III	2	732	1057.92	26.4	17.7	5.89	225	188.279	0.125527	5.18674	14.1992	10.4892	1.40627
LS84	São Lourenço de Ribapinhão	Spring	618590	4575830	I	2	558	1434.16	56	13.7	5.9	35	170.551	0.122489	5.40577	14.9202	9.3767	2.38123
LS58	São Mamede	Spring	605006	4573985	IV	2	445	1412.72	343	15.7	4.98	1385	165.887	0.108855	5.55995	14.7096	6.98479	2.15278
LS59	Borbela 2	Dug Well	605992	4575057	IV	2	465	1428.66	91.5	17.5	5.75	867	166.335	0.104169	5.45225	14.5974	7.66666	2.10571
LS73	Santuário Sra da Pena	Spring	611132	4574939	I	2	701	1312.97	41.9	16.9	5.4	1013	95.7332	0.0444127	5.31254	14.4085	12.1982	1.79427
LS82	Santuário Sra da Saúde I	Spring	617981	4574809	III	2	679	1057.92	49.8	12.8	5.12	1459	177.101	0.128093	5.24685	14.8718	9.78758	1.50526
LS83	Santuário Sra da Saúde II- VR	Spring	617972	4574804	III	2	681	901.86	51.6	13.2	5.17	1521	177.101	0.128093	5.24685	14.8718	9.78758	1.50526
LS85	Gache	Spring	613638	4574916	III	2	798	1305.26	63.7	15.1	5.42	1223	188.008	0.089033	4.83246	13.248	13.0849	0.566216
LS55	Bairro do ferreiros	Spring	605643	4572692	I	2	413	1503.97	248	15	5.72	137	151.838	0.102023	5.65484	14.9711	7.90969	1.93779
LS56	Parque Florestal	Spring	605585	4572963	I	2	419	1410.83	330	16.5	5.6	440	153.189	0.101234	5.65571	14.9389	7.94703	2.31192
LS57	Jardim da carreira	Spring	605461	4573078	IV	2	434	1463.89	291	16.6	6.1	142	155.557	0.102245	5.64969	14.9014	7.93537	2.31811
LS86	Ludares	Spring	613554	4572904	III	2	691	979.37	173.2	16.5	5.24	605	157.308	0.0799925	5.16196	14.8285	13.6057	0.745205
		n						60
		µ					731.667	1288.54	85.4033	15.1567	5.66833	457.6	189.301	0.130986	5.21284	14.9903	8.29078	1.74841
		σ					147.389	223.227	84.857	2.627	0.427758	387.336	63.5116	0.0370409	0.348042	0.899186	2.22264	0.741432
		Med					734.5	1287.56	48.8	15	5.595	387	173.748	0.12681	5.30201	14.9166	8.53232	1.71034
		CV					0.201443	0.17324	0.993603	0.173323	0.0754646	0.84645	0.335506	0.282786	0.0667663	0.0599844	0.268086	0.42406
		Min.					413	901.86	18.1	10.3	4.65	14	95.7332	0.0444127	4.38054	12.5126	2.87078	0.10785
		Máx					1078	2275.37	343	22.3	6.86	1521	397.028	0.213789	5.90247	18.8789	13.6057	3.38487

## Sheet: Table S9
Table S9- Correlation matrix of Cluster C2 dataset.
Altitude (m)	Precipitation (mm.year-1)	Electric conductivity (µS.cm-1)	Temperature (ºC)	pH	222Rn (Bq.L-1)	PRn (Bq.m-3.h-1)	CE (%)	K2O (%)	Th (ppm)	U(ppm)	Fracturing density (km.km-2)
1	-0.188807	-0.626605	-0.297642	-0.0460036	-0.0741805	0.0388034	0.342057	-0.377022	0.0220979	-0.175749	-0.332526	Altitude (m)
-0.188807	1	0.320326	0.225021	-0.16052	-0.171449	0.0822754	-0.0875135	0.312663	0.0242118	0.127702	0.301964	Precipitation
-0.626605	0.320326	1	0.198106	-0.0954332	0.0712597	-0.0596561	-0.194185	0.317652	-0.225356	-0.0173473	0.17414	Electric conductivity (µS.cm-1)
-0.297642	0.225021	0.198106	1	0.0257873	-0.138884	0.0729323	-0.0976021	0.130533	-0.156975	0.158394	0.0437935	Temperature
-0.0460036	-0.16052	-0.0954332	0.0257873	1	-0.504837	0.177414	0.258121	-0.227564	0.0853978	0.0216549	-0.0778087	pH
-0.0741805	-0.171449	0.0712597	-0.138884	-0.504837	1	-0.128718	-0.301547	0.155836	-0.203324	0.243958	-0.111426	222Rn
0.0388034	0.0822754	-0.0596561	0.0729323	0.177414	-0.128718	1	0.583351	-0.257505	0.182875	0.207297	-0.163134	PRn
0.342057	-0.0875135	-0.194185	-0.0976021	0.258121	-0.301547	0.583351	1	-0.633565	0.0891426	-0.456206	-0.0647086	CE
-0.377022	0.312663	0.317652	0.130533	-0.227564	0.155836	-0.257505	-0.633565	1	-0.0376753	0.271878	0.201914	K2O
0.0220979	0.0242118	-0.225356	-0.156975	0.0853978	-0.203324	0.182875	0.0891426	-0.0376753	1	-0.0855294	0.0386069	Th
-0.175749	0.127702	-0.0173473	0.158394	0.0216549	0.243958	0.207297	-0.456206	0.271878	-0.0855294	1	-0.26222	U
-0.332526	0.301964	0.17414	0.0437935	-0.0778087	-0.111426	-0.163134	-0.0647086	0.201914	0.0386069	-0.26222	1	Fracturing density (km.km-2)

[truncated: 20 more sheets: Table S10, Table S11, Table S12, Table S13, Table S14, Table S15, Table S16, Table S17, Table S18, Table S19, Table S20, Table S21, Table S22, Table S23, Table S24, Table S25, Table S26, Table S27, Table S28, Table S29]
